# Supplementary material
Source: PubMed Central journal article supplement (PMC8661408)

## SUPPLEMENTARY METHODS

### Subject Selection

All patients seen at Boston Children's Hospital are eligible for enrollment in the PrecisionLink Biobank. Subjects were enrolled in both inpatient and ambulatory settings, including the preoperative clinic, emergency department, and intensive care units. Subjects were enrolled beginning in December 2015. For enrolled subjects, EHR data available in the local Informatics for Integrating Biology and the Bedside (i2b2) database,[1, 2] a research "sidecar" to the EHR, become part of the Biobank phenotyping data. All available historical data for enrolled subjects are included, and data are refreshed monthly.

### MAP Data Preprocessing

International Classification of Diseases (ICD), 9<sup>th</sup> or 10<sup>th</sup> revision codes from the i2b2-based PrecisionLink data mart were grouped into "phecodes"[3-5] (available at <https://phewascatalog.org/phecodes>) to represent the primary diagnostic code(s) for each phenotype (Table 1 in the main text). Phecodes are hierarchical, and we include all codes that are more specific than those listed in Table 1. Each ICD code was only counted once per patient per day or once per patient per encounter for inpatient hospitalizations.

### Creation of Custom Dictionaries

The custom dictionary for the clinical text features of MAP was created by matching the concept unique identifiers (CUIs) listed in the Unified Medical Language System (UMLS)[6] for the ICD codes matching the phecode, the CUIs generated from the ICD code strings in UMLS, and the CUIs generated from the phenotype string in the PheWAS catalog. No human input was used to curate the custom dictionaries. An illustrative example is given in Supplementary Figure 1. The primary and secondary CUIs listed in Table 1 are those CUIs for each phecode with the highest and second-highest frequency in the Biobank cohort.

### MAP Evaluation

Physician-reviewed labels for 91 subjects with pulmonary hypertension (including both primary and secondary pulmonary vascular disease) were available from a prior study.[7] We randomly selected 20 subjects for each of the other nine phenotypes from among the filter-positive Biobank subjects for each phenotype. Physicians blinded to the MAP-predicted phenotype reviewed all available medical records for each subject and determined whether the subject had the phenotype of interest. These gold-standard labels were used to evaluate the classification performance of MAP and ICD codes or CUIs alone. When evaluating ICD codes or CUIs alone, in order to mimic the method used with MAP to determine thresholds for binary yes/no classification for each phenotype, we classified subjects as phenotype positive if their count of relevant codes was higher than a threshold chosen for each phenotype such that the percentage of phenotype positive subjects was closest to the phenotype prevalence estimated from the gold-standard labels.

## SUPPLEMENTARY REFERENCES

1. Gainer VS, Cagan A, Castro VM, et al. The Biobank Portal for Partners Personalized Medicine: A Query Tool for Working with Consented Biobank Samples, Genotypes, and Phenotypes Using i2b2. *J Pers Med* 2016;6(1):e11.
2. Klann JG, Abend A, Raghavan VA, et al. Data interchange using i2b2. *J. Am. Med. Inform. Assoc.* 2016;23:909-15.
3. Denny JC, Ritchie MD, Basford MA, et al. PheWAS: demonstrating the feasibility of a phenome-wide scan to discover gene-disease associations. *Bioinformatics* 2010;26(9):1205-10.
4. Denny JC, Bastarache L, Ritchie MD, et al. Systematic comparison of phenome-wide association study of electronic medical record data and genome-wide association study data. *Nat Biotechnol* 2013;31(12):1102-10.
5. Wu P, Gifford A, Meng X, et al. Mapping ICD-10 and ICD-10-CM Codes to Phecodes: Workflow Development and Initial Evaluation. *JMIR Med Inform* 2019;7(4):e14325.
6. Bodenreider O. The Unified Medical Language System (UMLS): integrating biomedical terminology. *Nucleic Acids Res* 2004;32(Database issue):D267-70.
7. Geva A, Gronsbell JL, Cai T, et al. A computable phenotype improves cohort ascertainment in a pediatric pulmonary hypertension registry. *J Pediatr* 2017;188:224-31.e5.

**Supplementary Table 1.** Complete list of concept unique identifiers (CUIs) included in the custom dictionary for each phenotype.

| <b>Phecode</b> | <b>Primary CUI</b> | <b>Secondary CUI</b> | <b>Remaining CUIs<sup>a</sup></b>                                                                                                                                                                                                                                                                                                                                                                                                                                                                                  |
|----------------|--------------------|----------------------|--------------------------------------------------------------------------------------------------------------------------------------------------------------------------------------------------------------------------------------------------------------------------------------------------------------------------------------------------------------------------------------------------------------------------------------------------------------------------------------------------------------------|
| <b>555.1</b>   | C0010346           | C0156147             | C0156146, C0267383, C0678202                                                                                                                                                                                                                                                                                                                                                                                                                                                                                       |
| <b>555.2</b>   | C0009324           | C2937222             | C0267390, C0267392, C0348737, C0267388, C0267389, C0375359, C0375360                                                                                                                                                                                                                                                                                                                                                                                                                                               |
| <b>555.</b>    | C0010346           | C0009324             | C0678202, C0156146, C0156147, C0267383, C0267390, C0267392, C0348737, C0267388, C0267389, C2937222, C0375359, C0375360                                                                                                                                                                                                                                                                                                                                                                                             |
| <b>495.</b>    | C0004096           | C0038218             | C0155877, C0155878, C0155880, C0155881, C1260416, C0694548, C0155886, C0155883, C0375333, C0375334, C1176341, C0155879, C1176339, C0155882, C1176340, C0015263, C1176342                                                                                                                                                                                                                                                                                                                                           |
| <b>250.1</b>   | C0011854           | C0375114             | C0375116, C0375123, C0375125, C0375127, C0375129, C0375146, C0375148, C0375150, C0375152, C0375118, C0375120, C0375131, C0375133, C0375135, C0375136, C0375138, C0375140, C0375142, C0375144                                                                                                                                                                                                                                                                                                                       |
| <b>345.1</b>   | C0014544           | C0037769             | C0017332, C0154707, C1112693, C0270823, C0311335, C0154715, C0154716, C0085543, C0154717, C0154718, C1719409, C0154719, C0154720, C0154722, C0311334, C0154709, C0154710, C1719405, C1306246, C0154713, C1719407, C0154714, C0154712, C0553587, C0234974, C0014547                                                                                                                                                                                                                                                 |
| <b>345.3</b>   | C0009951           | C0009952             | C0751057, C2921125, C0490011                                                                                                                                                                                                                                                                                                                                                                                                                                                                                       |
| <b>345.</b>    | C0014544           | C0009951             | C1719410, C0154721, C0017332, C0154707, C1112693, C0270823, C0311335, C0037769, C0154715, C0154716, C0085543, C0154717, C0154718, C1719409, C0154719, C0154720, C0154722, C0311334, C0154709, C0154710, C1719405, C1306246, C0154713, C1719407, C0154714, C0154712, C0009952, C0751057, C2921125, C0490011, C0553587, C0234974, C0014547                                                                                                                                                                           |
| <b>714.2</b>   | C0553662           | C0157917             | C0409667, C0837691, C0157916, C0157918                                                                                                                                                                                                                                                                                                                                                                                                                                                                             |
| <b>425.</b>    | C0878544           | C0007194             | C0553980, C1959600, C0014117, C0340419, C0348615, C0340422, C0155699, C0036529, C0007192, C1739395                                                                                                                                                                                                                                                                                                                                                                                                                 |
| <b>428.</b>    | C0018802           | C0018801             | C0155582, C0023212, C1135191, C2215291, C1135194, C2215175, C2882273, C2882274, C2882275, C2882276, C1135196, C2215111, C2074673, C2215174, C0810005                                                                                                                                                                                                                                                                                                                                                               |
| <b>415.2</b>   | C0152171           | C0238074             | C0152102, C0856722, C0155673                                                                                                                                                                                                                                                                                                                                                                                                                                                                                       |
| <b>747.1</b>   | C0041207           | C0018818             | C0158611, C0009995, C0869419, C0158623, C0149530, C0024649, C0477999, C0018798, C0152419, C0158629, C0158606, C0040761, C0013069, C0344616, C0158608, C0039685, C0152424, C2939192, C0014116, C0031192, C0029608, C0152238, C0158609, C0158610, C0158621, C0265830, C0242855, C0162164, C0477996, C0158616, C0013481, C0152417, C0158617, C0158618, C0158619, C0152101, C0034084, C0345010, C0013274, C0003492, C0478000, C0302467, C0009681, C3161124, C0241790, C3161125, C0158632, C0036400, C0158634, C0029520 |

<sup>a</sup> Unified Medical Language System Release 2012AA

**Supplementary Table 2.** Registry cohorts excluded from comparison to chart review. Registries with fewer than 200 subjects, those that combined multiple phenotypes (i.e., were not disease- or condition-specific), and those for phenotypes for which a specific phecode does not exist were excluded.

| <b>Registry</b>                                             | <b>Exclusion Reason</b>      |
|-------------------------------------------------------------|------------------------------|
| Epilepsy                                                    | N = 89                       |
| Opsoclonus-myoclonus syndrome                               | N = 107                      |
| Congenital heart disease, cardiomyopathy, and heart failure | Includes multiple phenotypes |
| Pulmonary hypertension                                      | N = 66                       |
| Cerebrospinal fluid                                         | Includes multiple phenotypes |
| Elevated LDL cholesterol                                    | No specific phecode          |
| Cardiovascular and Critical Care                            | Includes multiple phenotypes |
| Immunological studies                                       | Includes multiple phenotypes |
| Ehlers Danlos syndrome                                      | N = 18                       |
| Disorders of Sex Development                                | Includes multiple phenotypes |
| Neonatal intensive care unit                                | Includes multiple phenotypes |
| Pulmonary                                                   | Includes multiple phenotypes |
| Hearing loss                                                | N = 51                       |
| Bronchiectasis                                              | N = 17                       |
| Interstitial lung disease                                   | N = 8                        |
| Early onset childhood obesity                               | N = 35                       |

**Supplementary Table 3.** Demographics of 14,303 subjects enrolled in the PrecisionLink Biobank and 36,800 subjects enrolled in the Partners Biobank.

| <b>Variable</b>           | <b>Frequency (percent)<br/>PrecisionLink</b> | <b>Frequency (percent)<br/>Partners Biobank</b> |
|---------------------------|----------------------------------------------|-------------------------------------------------|
| <b>Sex</b>                |                                              |                                                 |
| Female                    | 7283 (51)                                    | 21,413 (58)                                     |
| Male                      | 7019 (49)                                    | 15,387 (42)                                     |
| Other/Unknown             | 1 (0)                                        | 0 (0)                                           |
| <b>Age (years)</b>        |                                              |                                                 |
| < 5                       | 2220 (16)                                    | 10 (0)                                          |
| 5 – < 10                  | 2568 (18)                                    | 61 (0)                                          |
| 10 – < 20                 | 5702 (40)                                    | 140 (0)                                         |
| 20 – < 30                 | 2386 (17)                                    | 2856 (8)                                        |
| 30 – < 40                 | 628 (4)                                      | 3798 (10)                                       |
| 40 – < 50                 | 336 (2)                                      | 4680 (13)                                       |
| 50 – < 60                 | 230 (2)                                      | 7348 (20)                                       |
| ≥ 60                      | 233 (2)                                      | 17907 (49)                                      |
| <b>Race</b>               |                                              |                                                 |
| White                     | 9369 (66)                                    | 30854 (84)                                      |
| Black or African American | 826 (6)                                      | 2090 (6)                                        |
| Other/Unknown             | 4108 (29)                                    | 3856 (10)                                       |
| <b>Ethnicity</b>          |                                              |                                                 |
| Hispanic or Latino        | 578 (5)                                      | 1601 (4)                                        |
| Other/Unknown             | 13725 (95)                                   | 35199 (96)                                      |

**Supplementary Table 4.** Comparison of the most frequent diagnoses between Partners and PrecisionLink Biobanks.

| <u>PrecisionLink</u> |                                                            |                       | <u>Partners</u> |                                        |                       |
|----------------------|------------------------------------------------------------|-----------------------|-----------------|----------------------------------------|-----------------------|
| <b>Phecode</b>       | <b>Description</b>                                         | <b>Prevalence (%)</b> | <b>Phecode</b>  | <b>Description</b>                     | <b>Prevalence (%)</b> |
| 1010.                | Other tests                                                | 70                    | 1010.           | Other tests                            | 55                    |
| 747.1                | Cardiac congenital anomalies                               | 30                    | 745.            | Pain in joint                          | 52                    |
| 785.                 | Abdominal pain                                             | 29                    | 401.1           | Essential hypertension                 | 51                    |
| 395.3                | Nonrheumatic tricuspid valve disorders                     | 29                    | 272.1           | Hyperlipidemia                         | 49                    |
| 563.                 | Constipation                                               | 28                    | 773.            | Pain in limb                           | 41                    |
| 1002.                | Symptoms concerning nutrition, metabolism, and development | 28                    | 785.            | Abdominal pain                         | 40                    |
| 426.7                | Abnormal electrocardiogram                                 | 24                    | 760.            | Back pain                              | 37                    |
| 530.1                | Esophagitis, GERD and related diseases                     | 24                    | 512.8           | Cough                                  | 35                    |
| 427.5                | Arrhythmia (cardiac) NOS                                   | 23                    | 740.9           | Osteoarthritis NOS                     | 33                    |
| 512.8                | Cough                                                      | 21                    | 530.1           | Esophagitis, GERD and related diseases | 32                    |

**Supplementary Figure 1.** Schematic of creation of the custom dictionary of concept unique identifiers (CUIs) for the asthma phenotype. International Classification of Diseases (ICD), 9<sup>th</sup> revision (ICD-9) codes matching the phenotype of interest are mapped to CUIs in the Unified Medical Language System (UMLS) (1). The string for the ICD-9 code description is also matched to the UMLS, and any additional CUIs are added to the dictionary (2). Finally, the phenotype string matching the phecode is matched to the UMLS and any additional CUIs are added to the dictionary (3). (In this example, all matching CUIs had already been added from steps 1 and 2.)

| Phecode | Phenotype                                    | ICD-9  | ICD9 String                                                       |
|---------|----------------------------------------------|--------|-------------------------------------------------------------------|
| 495.    | Asthma                                       | 493    | Asthma                                                            |
| 495.    | Asthma                                       | 493    | Extrinsic asthma                                                  |
| 495.    | Asthma                                       | 493    | Extrinsic asthma without mention of status asthmaticus            |
| 495.    | Asthma                                       | 493.1  | Intrinsic asthma                                                  |
| 495.    | Asthma                                       | 493.1  | Intrinsic asthma without mention of status asthmaticus            |
| 495.    | Asthma                                       | 493.8  | Other forms of asthma                                             |
| 495.    | Asthma                                       | 493.82 | Cough variant asthma                                              |
| 495.    | Asthma                                       | 493.9  | Asthma, unspecified                                               |
| 495.    | Asthma                                       | 493.9  | Asthma, unspecified type, without mention of status asthmaticus   |
| 495.1   | Chronic obstructive asthma                   | 493.2  | Chronic obstructive asthma                                        |
| 495.1   | Chronic obstructive asthma                   | 493.2  | Chronic obstructive asthma, without mention of status asthmaticus |
| 495.11  | Chronic obstructive asthma with exacerbation | 493.21 | Chronic obstructive asthma, with status asthmaticus               |
| 495.11  | Chronic obstructive asthma with exacerbation | 493.22 | Chronic obstructive asthma, with acute exacerbation               |
| 495.2   | Asthma with exacerbation                     | 493.01 | Extrinsic asthma with status asthmaticus                          |
| 495.2   | Asthma with exacerbation                     | 493.02 | Extrinsic asthma with acute exacerbation                          |
| 495.2   | Asthma with exacerbation                     | 493.11 | Intrinsic asthma with status asthmaticus                          |
| 495.2   | Asthma with exacerbation                     | 493.12 | Intrinsic asthma with acute exacerbation                          |
| 495.2   | Asthma with exacerbation                     | 493.81 | Exercise induced bronchospasm                                     |
| 495.2   | Asthma with exacerbation                     | 493.91 | Asthma, unspecified type, with status asthmaticus                 |
| 495.2   | Asthma with exacerbation                     | 493.92 | Asthma, unspecified type, with acute exacerbation                 |

  

The diagram below illustrates the process of mapping phecodes to CUIs through three steps:

- Step 1:** ICD-9 codes are mapped to UMLS CUIs. For example, ICD-9 code 493 maps to CUIs C0004096, C0155880, C1260416, C0155883, and C0375334.
- Step 2:** ICD-9 strings are mapped to UMLS CUIs. For example, the string "Asthma" maps to CUIs C1176341, C0015263, C0155877, C0155878, C0155881, C0694548, and C0155886.
- Step 3:** Phenotype strings are mapped to UMLS CUIs. For example, the phenotype "Asthma" maps to CUIs C1176341, C0015263, C0155877, C0155878, C0155881, C0694548, and C0155886.

**Supplementary Figure 2.** Distribution of the per-patient length of stay (A) and counts of International Classification of Diseases (ICD) codes (B) for subjects enrolled in the PrecisionLink and Partners Biobanks.

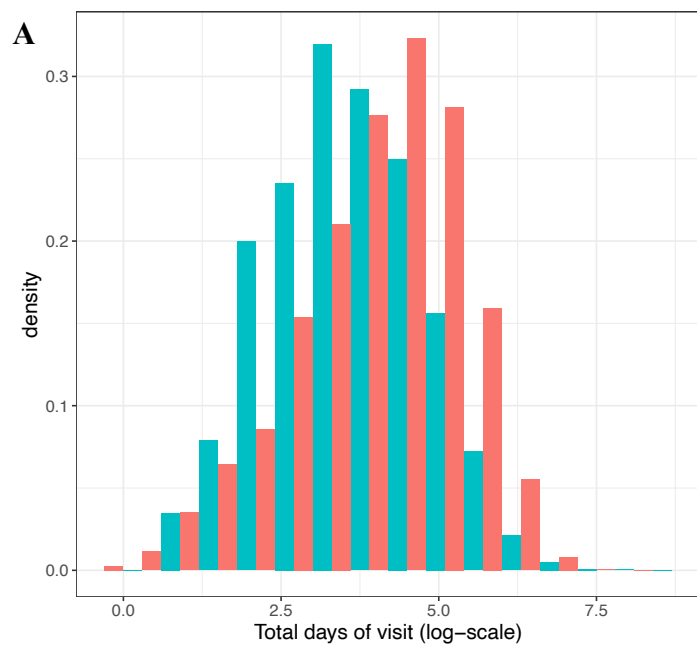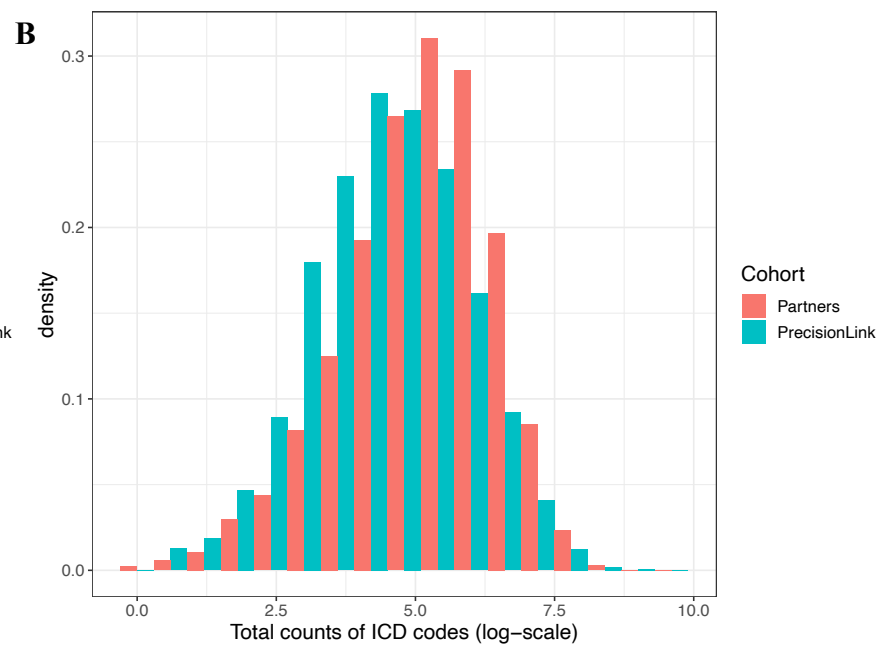



**Supplementary Figure 3.** Comparison of phenotype-specific counts of relevant International Classification of Diseases (ICD) codes between filter-positive subjects (ICD count  $\geq 1$ ) in the PrecisionLink and Partners Biobanks.

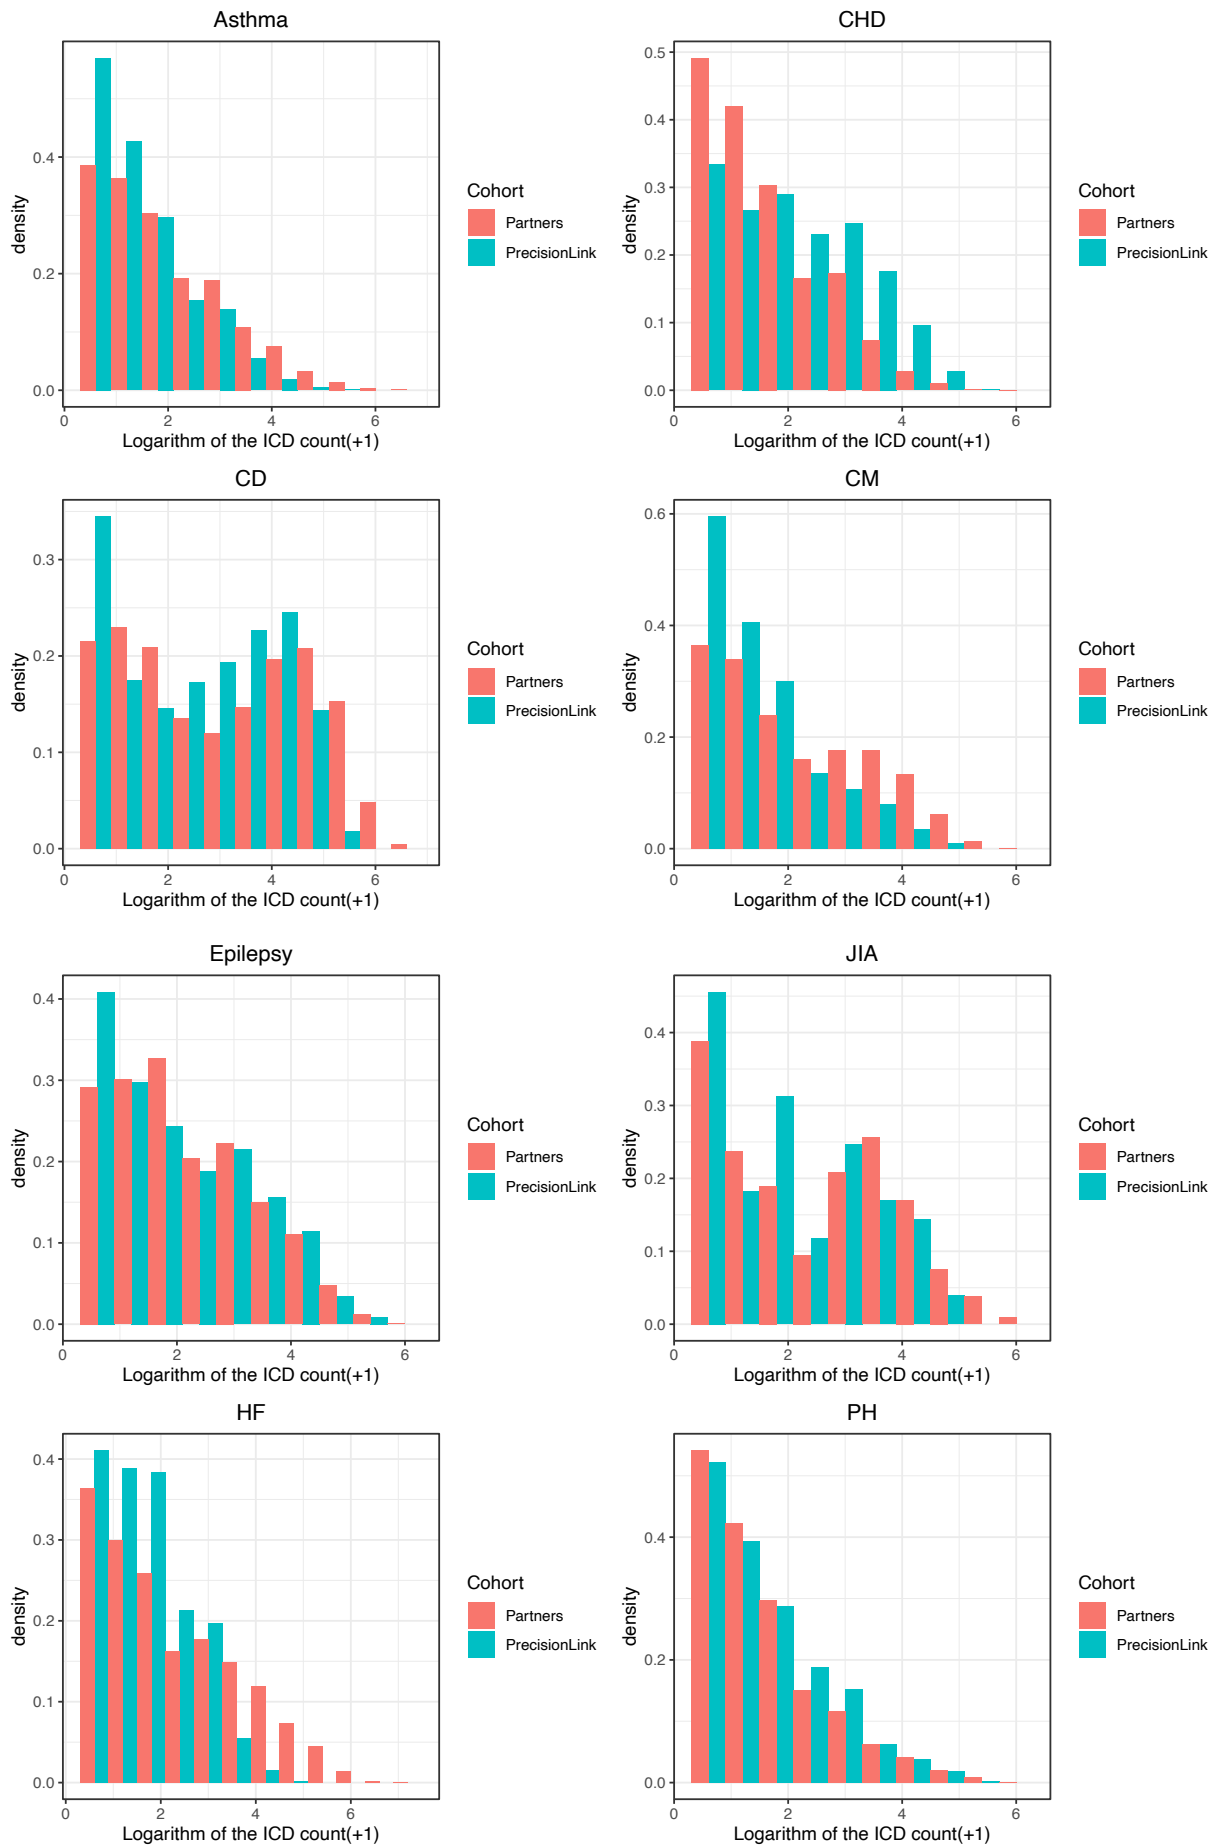

**Supplementary Figure 3 (cont.).** Comparison of phenotype-specific counts of relevant International Classification of Diseases (ICD) codes between filter-positive subjects (ICD count  $\geq 1$ ) in the PrecisionLink and Partners Biobanks.

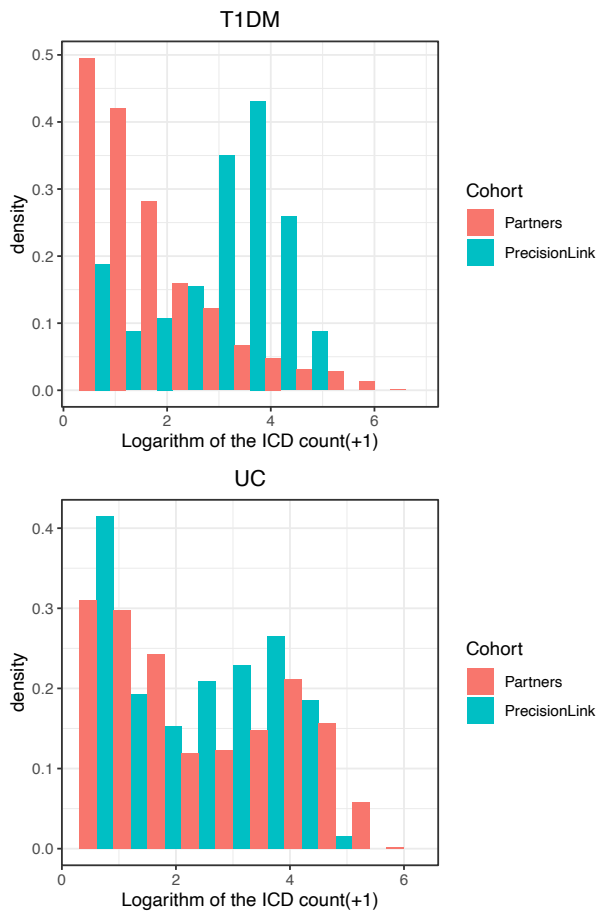

**Supplementary Figure 4.** Comparison of phenotype-specific counts of relevant concept unique identifier (CUI) codes between subjects in the PrecisionLink and Partners Biobanks.

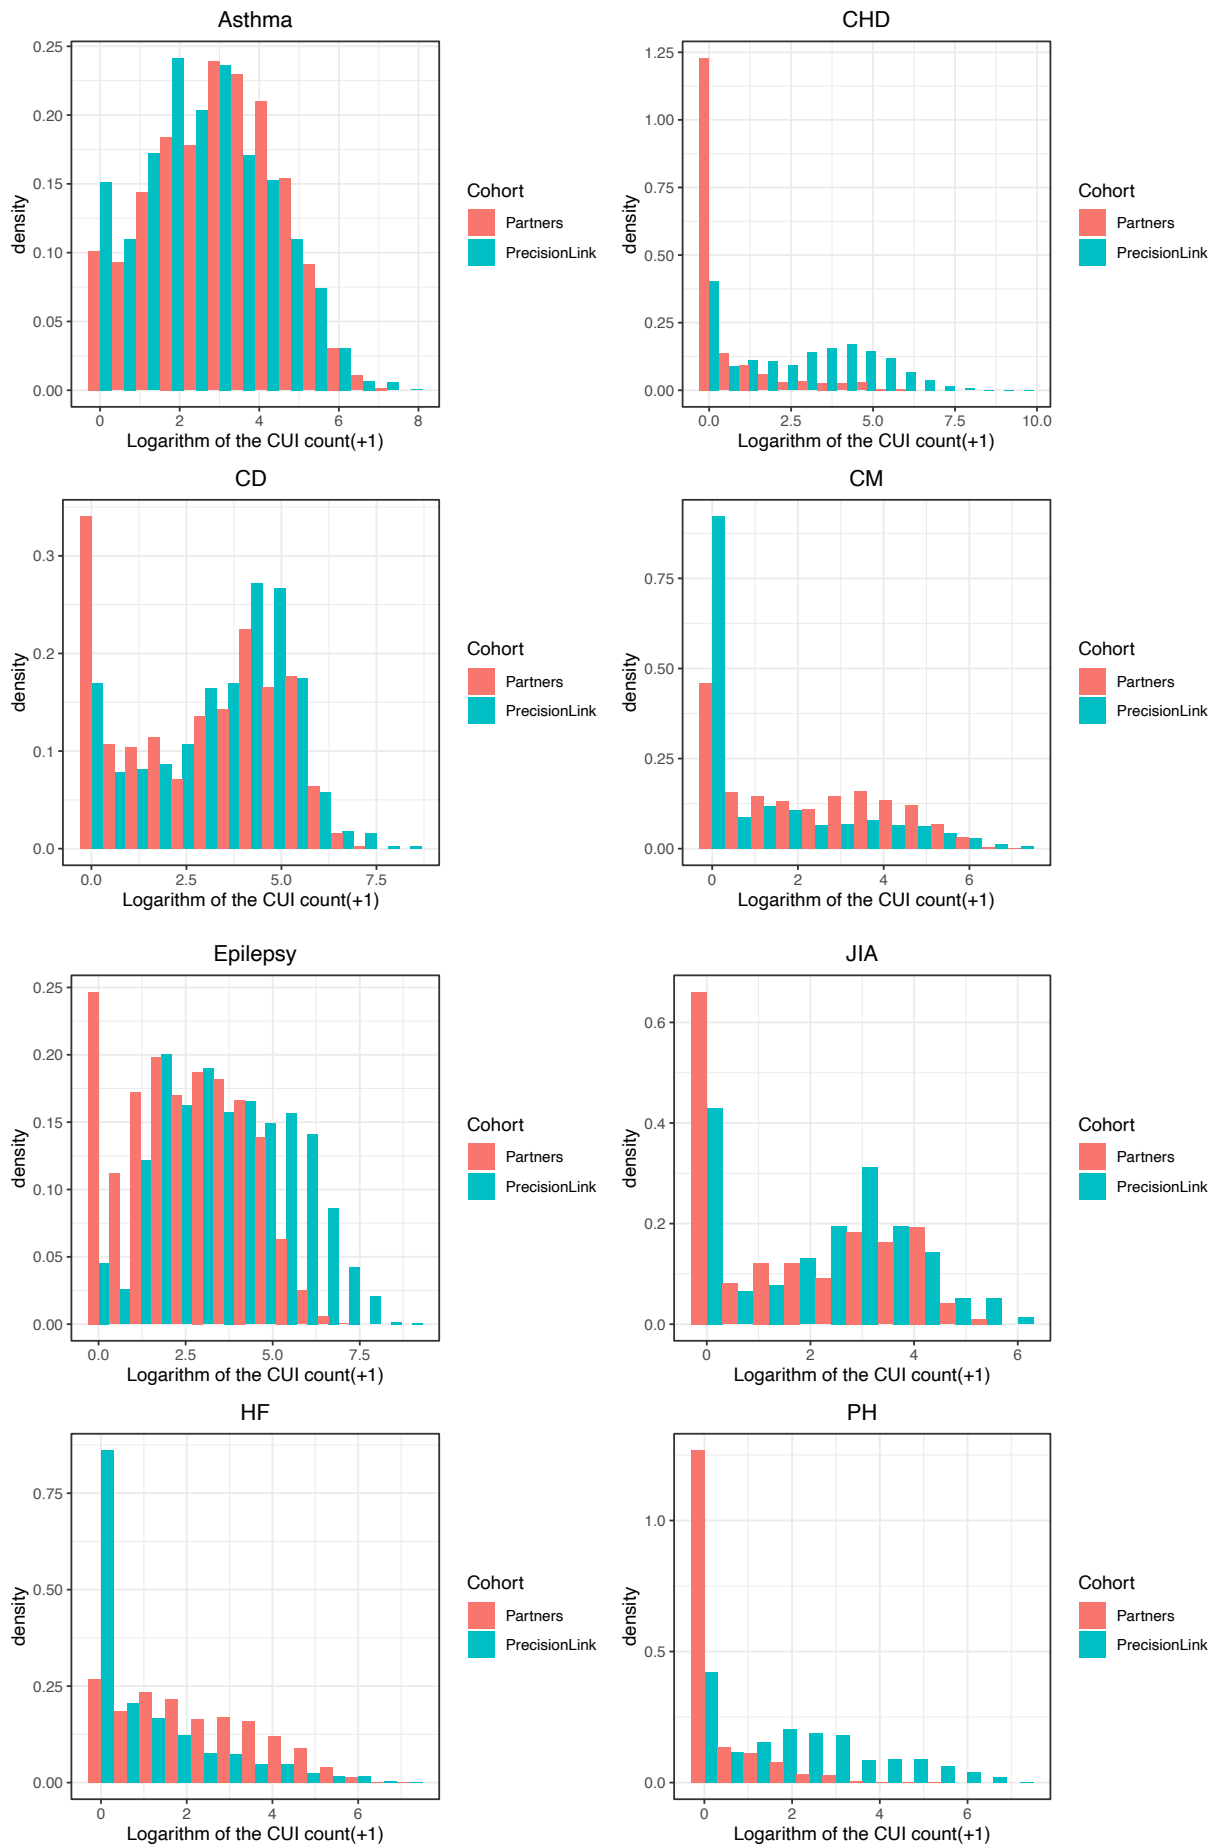

**Supplementary Figure 4 (cont.).** Comparison of phenotype-specific counts of relevant concept unique identifier (CUI) codes between subjects in the PrecisionLink and Partners Biobanks.

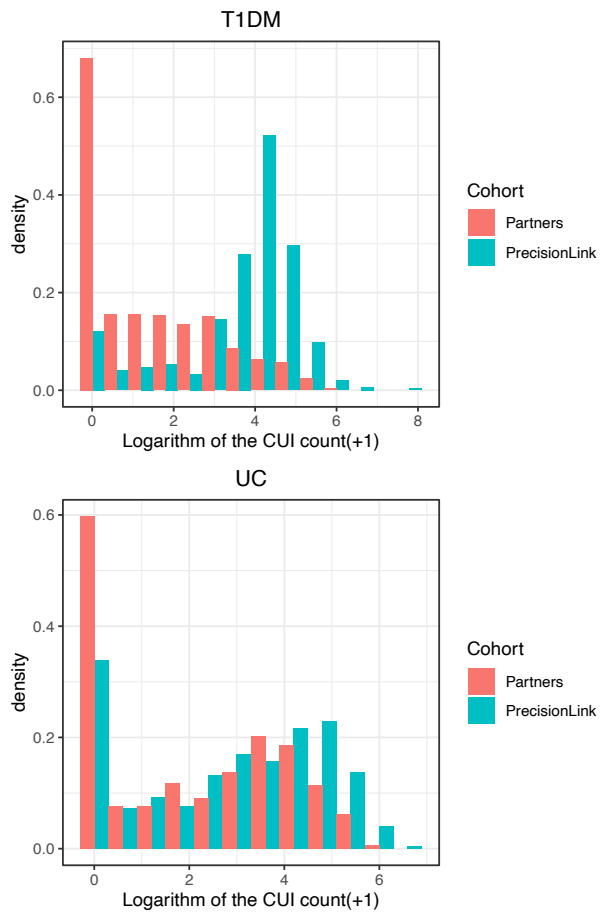

**Supplementary Figure 5.** Comparison of counts of relevant concept unique identifier (CUI) codes between MAP-predicted positive (cases) and negative (control) subjects for each phenotype.

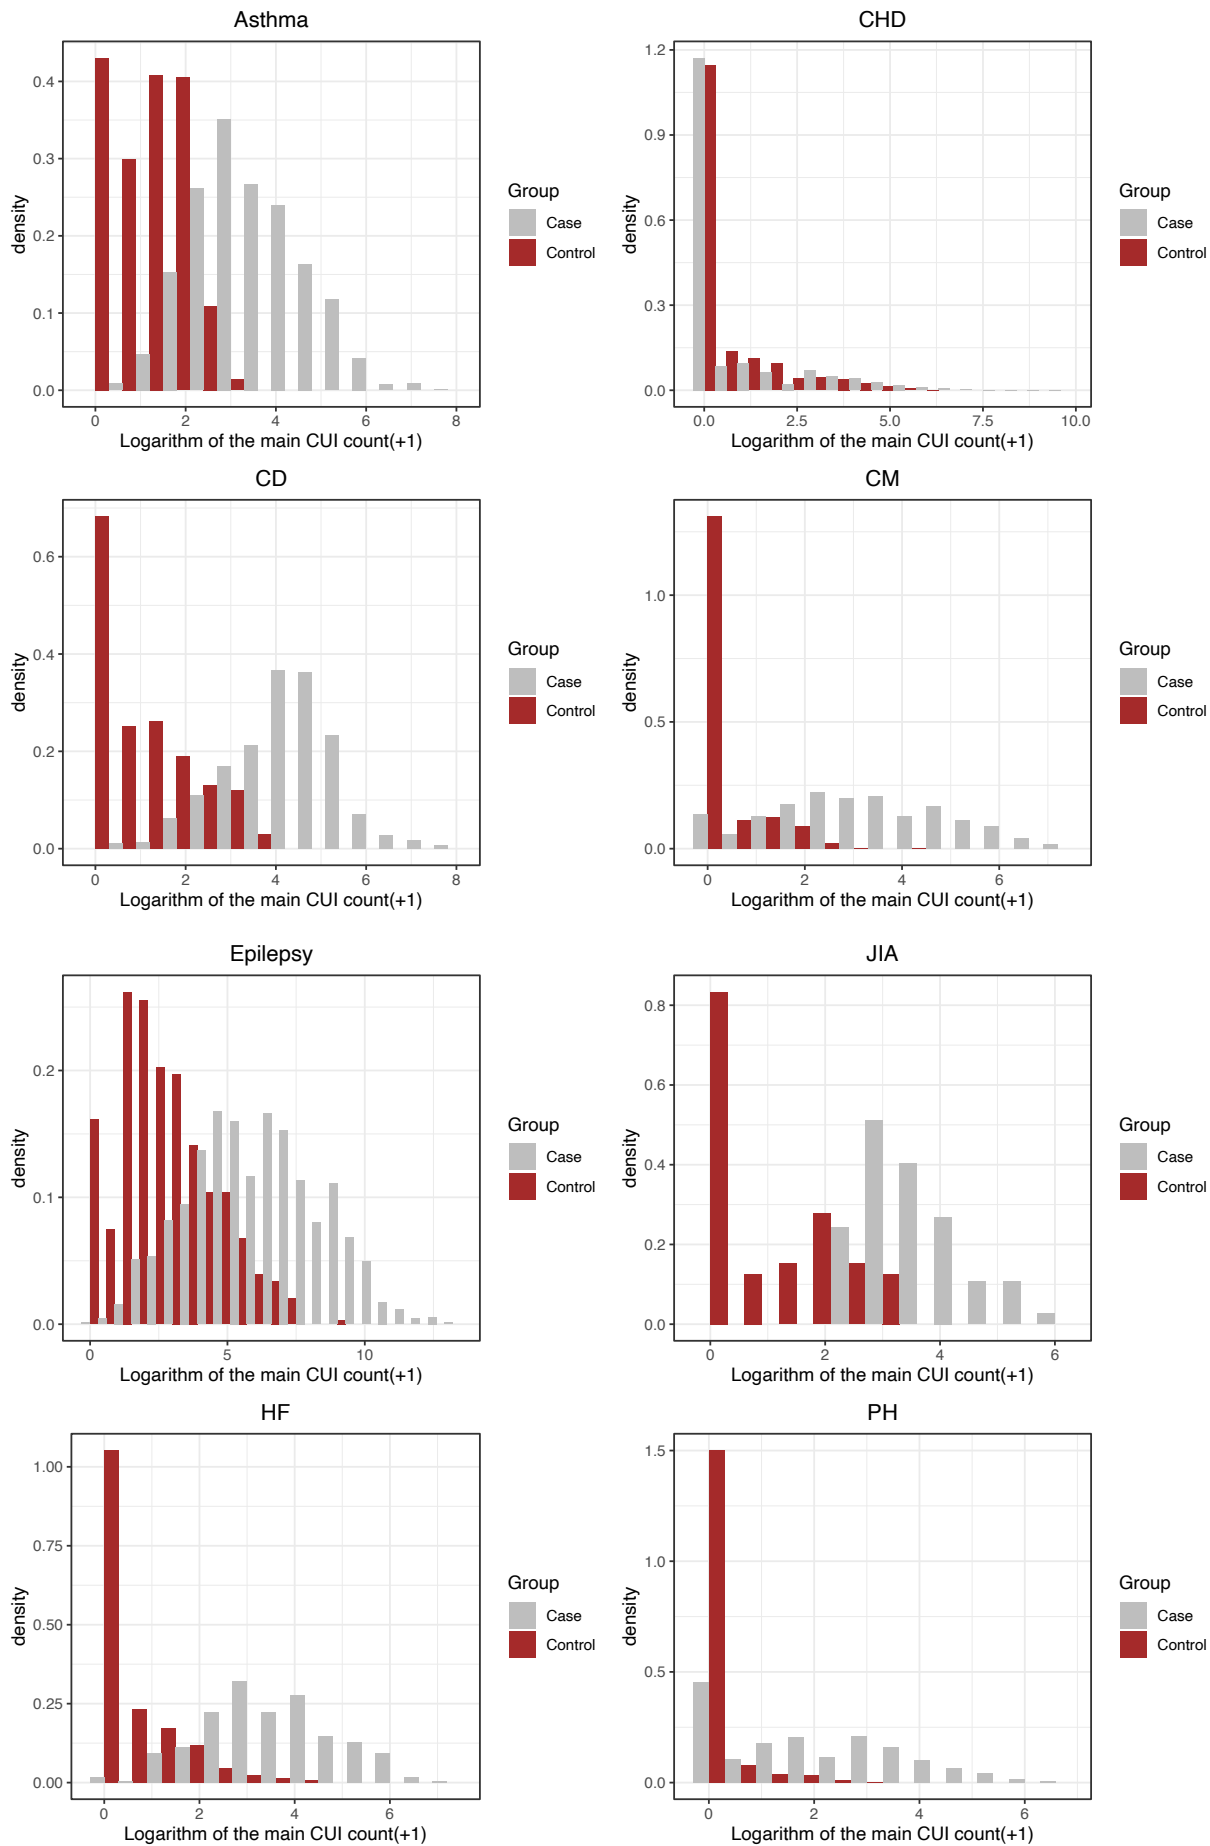

**Supplementary Figure 5 (cont.).** Comparison of counts of relevant concept unique identifier (CUI) codes between MAP-predicted positive (cases) and negative (control) subjects for each phenotype.

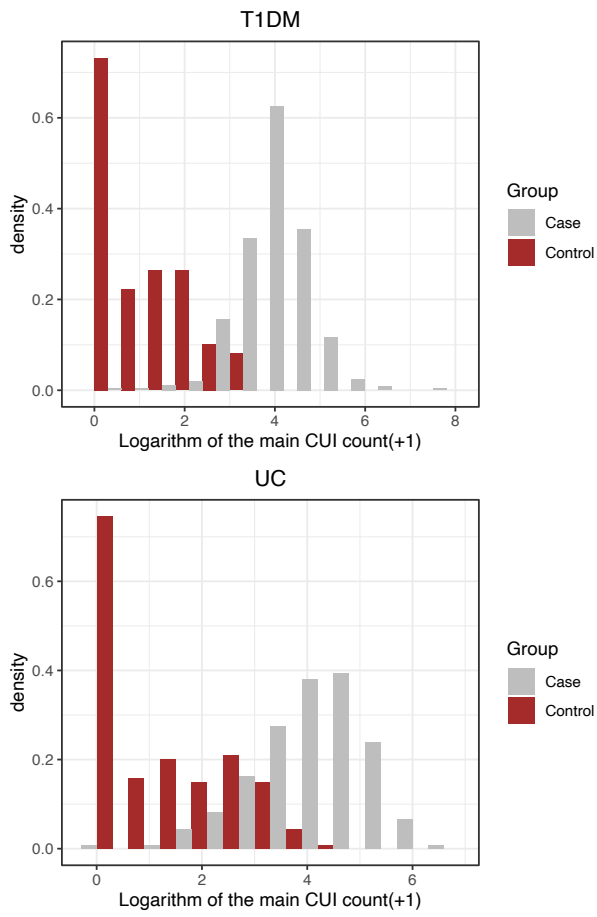

Supplement: ocaa343_supplementary_data.pdf [file ocaa343_supplementary_data.pdf]
